# Supplementary material for: TDP-43 Cytoplasmic Translocation in the Skin Fibroblasts of ALS Patients
Source: MDPI journal article supplement (doi:10.3390/cells11020209), 2022-01-08
Supplement: s1 [file s1]

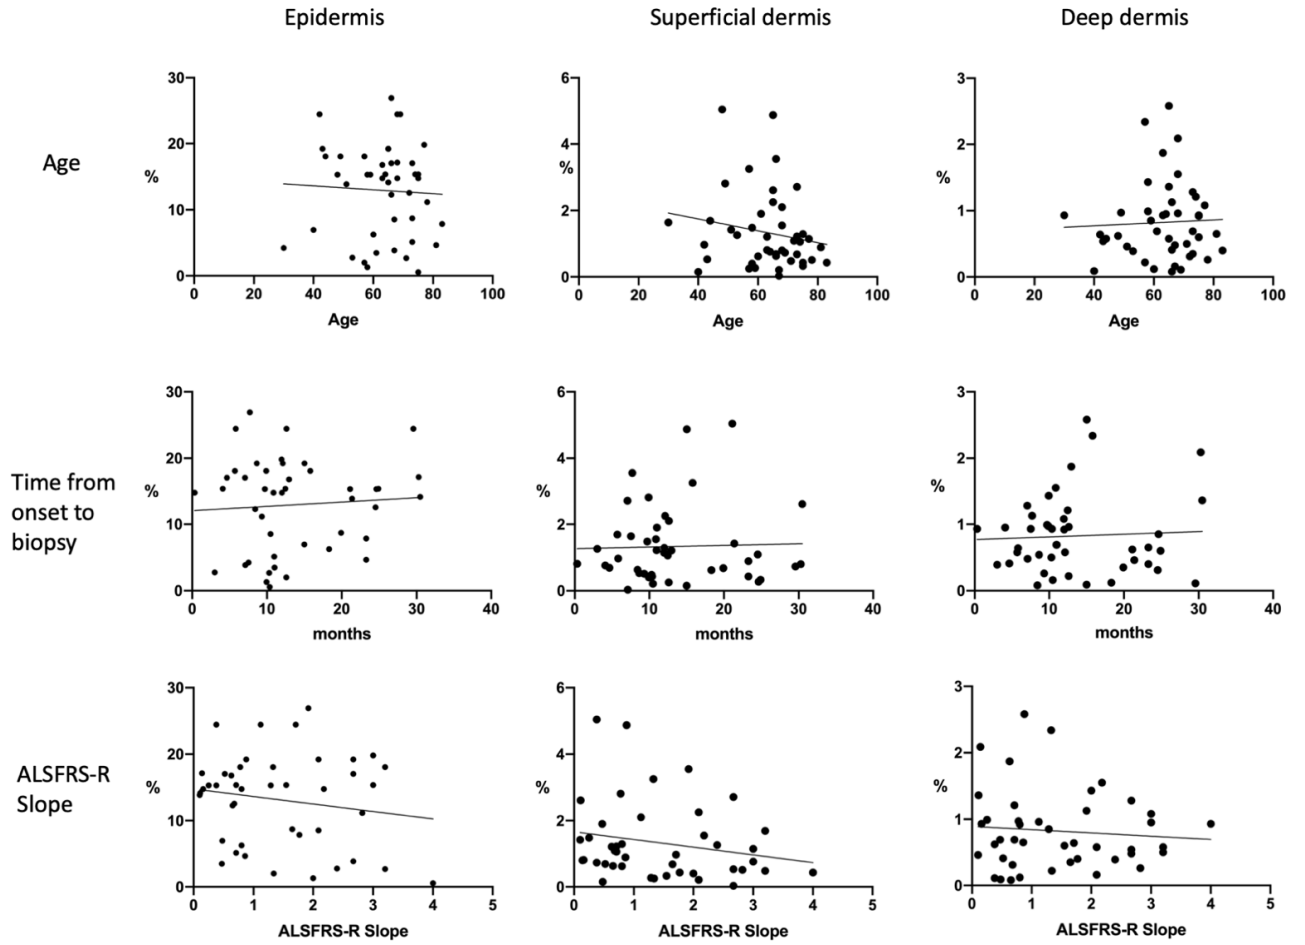

**Figure S1.** Correlation graphs of the percentage of cytoplasmic TDP-43 immunoreactivity with age, time from onset to biopsy and ALSFRS-R slope in the three different skin layers.
